# Supplementary material
Source: publisher figshare collection journal article supplement (https://tandf.figshare.com/ndownloader/files/18058151)
Supplement: Supplementary file 1 [file 18058151]

Synthesis, Transformations and Halocyclization of 8-(Prop-2-ynylsulfanyl)quinoline and 8-(2-Bromoprop-2-enylsulfanyl)quinoline

Kim Dmitriy Gymnanovich, Vershinina Evgenia Anatol’evna, Sharutin Vladimir Victorovich

Theoretical and Applied Chemistry Department, South Ural State University (national research university), Chelyabinsk, Russia

Contact: Vershinina Evgenia Anatol’evna; correspondence address: 454080 Russia, Chelyabinsk, Lenin prospekt, 76; phone: +7-351-267-95-70; e-mail: enka84@mail.ru

Kim Dmitriy Gymnanovich, professor, South Ural State University (national research university), Theoretical and Applied Chemistry Department.

Vershinina Evgenia Anatol’evna, researcher, South Ural State University (national research university), Theoretical and Applied Chemistry Department.

Sharutin Vladimir Victorovich, professor, South Ural State University (national research university).
